# Supplementary material for: The Atmospheric Pollution Characteristics and Health Risk Assessment of Perfluorohexane Sulfonic Acid in Beijing
Source: MDPI journal article supplement (doi:10.3390/atmos14020365), 2023-02-13
Supplement: s1 [file s1]

# Supplementary: The Atmospheric Pollution Characteristics and Health Risk Assessment of Perfluorohexane Sulfonic Acid in Beijing

**Table S1.** Some abbreviations that were used in this paper.

| Abbreviations | Unabbreviated Form                             |
|---------------|------------------------------------------------|
| PFHxS         | Perfluorohexane sulfonic acid                  |
| PFASs         | Per- and polyfluoroalkyl compounds             |
| PFOS          | Perfluorooctane sulfonic acid                  |
| PFHxSF        | Perfluorohexane sulfonyl fluoride              |
| PFOSF         | Perfluorooctane sulfonyl fluoride              |
| POPs          | Persistent organic pollutants                  |
| ESI           | Electrospray ionization source                 |
| CV            | Cone voltage                                   |
| CE            | Collision energy                               |
| RT            | Retention time                                 |
| MDLs          | Method detection limits                        |
| RSD           | Relative standard deviation                    |
| POPRC         | Persistent Organic Pollutants Review Committee |

**Table S2.** Health risk assessment parameters.

| Parameter                                         | Abbreviation | Children<br>(6–17 yrs) | Adults           | References |
|---------------------------------------------------|--------------|------------------------|------------------|------------|
| Average time (d)                                  | AT           | 365 × ED               | 365 × ED         | [37]       |
| Inhalation rate (m <sup>3</sup> /d)               | IR           | 10.1                   | 15.7             | [44,45]    |
| Exposure duration (yr)                            | ED           | 72                     | 72               | [46]       |
| Exposure frequency (d/yr)                         | EF           | 350                    | 350              | [47]       |
| Body weight (kg)                                  | BW           | 19.2                   | 61.8             | [48]       |
| Exposed skin area (cm <sup>2</sup> )              | SA           | 2800                   | 5700             | [49]       |
| Skin adherence factor<br>(mg/ (m <sup>2</sup> d)) | AF           | 0.2                    | 0.07             | [49]       |
| Conversion factor (kg/mg)                         | CF           | 10 <sup>-6</sup>       | 10 <sup>-6</sup> | [49]       |
| Dermal adsorption fraction                        | ABF          | 0.001                  | 0.001            | [50]       |
| Ingestion rate                                    | SRI          | 200                    | 100              | [50]       |

**Table S3.** Atmospheric PFHxS concentrations reported by publications.

| Time | Location                | Concentrations<br>(pg/m <sup>3</sup> )   | References |
|------|-------------------------|------------------------------------------|------------|
| 2021 | Beijing, China          | Gas 0.625–1.875,<br>Particle 0.625–1.875 | This study |
| 2019 | Xiamen, China           | Gas 0.05–0.16,<br>Particle ND-0.17       | [22]       |
| 2018 | Jiangsu, China          | Particle ND-0.043                        | [21]       |
| 2017 | China                   | ND-13.2                                  | [51]       |
| 2016 | Bohai sea<br>Yellow sea | Gas ND-0.26,<br>Particle 1.2–2.6         | [18]       |

|           |                                                                       |                               |      |
|-----------|-----------------------------------------------------------------------|-------------------------------|------|
| 2015–2016 | Mexico, Costa Rica,<br>Colombia, Brazil, Bolivia,<br>Argentina, Chile | ND-2.6                        | [52] |
| 2015      | China                                                                 | ND-4.2                        | [46] |
| 2014–2015 | China                                                                 | ND-4.39                       | [19] |
| 2013–2015 | Chaohu, China                                                         | 0.09–1.91                     | [53] |
| 2013–2014 | Ontario, Canada                                                       | ND-3.33                       | [54] |
| 2013      | Czech Republic                                                        | ND-1.419                      | [55] |
| 2012–2014 | The National Atmospheric<br>Observatory Košetice in<br>Czech Republic | Gas 0.03,<br>Particle ND-0.18 | [20] |
| 2011      | Shenzhen, China                                                       | ND-1.2                        | [38] |
| 2006–2015 | Canada and Norway                                                     | ND-0.62                       | [56] |

**Table S4.** Wet–dry deposition flux of PFHxS.

| Time          | Rainfall<br>(mm) | Wet Deposition Flux<br>(ng/m <sup>2</sup> /month) | Dry Deposition Flux<br>(ng/m <sup>2</sup> /month) | Total Deposition<br>flux (ng/m <sup>2</sup> /month) |
|---------------|------------------|---------------------------------------------------|---------------------------------------------------|-----------------------------------------------------|
| June          | 72               | 18.2                                              | 22.7                                              | 40.9                                                |
| July          | 497              | 46.3                                              | 8.91                                              | 55.2                                                |
| August        | 284              | 35.7                                              | 18.1                                              | 53.9                                                |
| Septem<br>ber | 208              | 18.8                                              | 10.8                                              | 29.6                                                |
| October       | 47               | 7.54                                              | 16.2                                              | 23.7                                                |
| Novem<br>ber  | 20               | 4.50                                              | 20.2                                              | 24.7                                                |

## References

- Ministry of Environmental Protection of the People's Republic of China. *Exposure Factors Handbook of Chinese Population (Adult)*; China Environmental Press: Beijing, China, 2013. (In Chinese)
- Ministry of Environmental Protection of the People's Republic of China. *Exposure Factors Handbook of Chinese Population (Children)*; China Environmental Press: Beijing, China, 2016. (In Chinese)
- Liu, Y.; Liu, W.J.; Xu, Y.S.; Zhao, Y.Z.; Wang, P.; Yu, S.Y.; Zhang, J.D.; Tang, Y.; Xiong, G.N.; Tao, S.; et al. Characteristics and human inhalation exposure of ionic per- and polyfluoroalkyl substances (PFASs) in PM10 of cities around the Bohai Sea: Diurnal variation and effects of heating activity. *Sci. Total Environ.* **2019**, *687*, 177–187.
- Sanchez-Pinero, J.; Novo-Quiza, N.; Pernas-Castano, C.; Moreda-Pineiro, J.; Muniategui-Lorenzo, S.; Lopez-Mahia, P. Inhalation bioaccessibility of multi-class organic pollutants associated to atmospheric PM2.5: Correlation with PM2.5 properties and health risk assessment. *Environ. Pollut.* **2022**, *307*, 119577.
- Xu, Z.J.; Zhu, H.B.; Shu, L.Y.; Lai, X.X.; Lu, W.; Fu, L.; Jiang, B.; He, T.; Wang, F.P.; Li, Q.S. Estimation of the fraction of soil-borne particulates in indoor air by PMF and its impact on health risk assessment of soil contamination in Guangzhou, China. *Environ. Pollut.* **2022**, *308*, 119623.
- Li, J.F.; Zhang, Z.Z.; Ma, L.Y.; Zhang, Y.; Niu, Z.G. Implementation of USEPA RfD and SFO for improved risk assessment of organophosphate esters (organophosphate flame retardants and plasticizers). *Environ. Int.* **2018**, *114*, 21–26.
- Shi, G.T.; Chen, Z.L.; Bi, C.J.; Wang, L.; Teng, J.Y.; Li, Y.S.; Xu, S.Y. A comparative study of health risk of potentially toxic metals in urban and suburban road dust in the most populated city of China. *Atmos. Environ.* **2011**, *45*, 764–771.
- Han, D.M.; Ma, Y.G.; Huang, C.; Zhang, X.F.; Xu, H.; Zhou, Y.; Liang, S.; Chen, X.J.; Huang, X.Q.; Liao, H.X.; et al. Occurrence and source apportionment of perfluoroalkyl acids (PFAAs) in the atmosphere in China. *Atmos. Chem. Phys.* **2019**, *19*, 14107–14117.
- Rauert, C.; Harner, T.; Schuster, J.K.; Eng, A.; Fillmann, G.; Castillo, L.E.; Fentanes, O.; Ibarra, M.V.; Miglioranza, K.S.B.; Rivadeneira, I.M.; et al. Atmospheric Concentrations of New Persistent Organic Pollutants and Emerging Chemicals of Concern in the Group of Latin America and Caribbean (GRULAC) Region. *Environ. Sci. Technol.* **2018**, *52*, 7240–7249.
- Liu, W.X.; He, W.; Wu, J.Y.; Wu, W.J.; Xu, F.L. Distribution, partitioning and inhalation exposure of perfluoroalkyl acids (PFAAs) in urban and rural air near Lake Chaohu, China. *Environ. Pollut.* **2018**, *243*, 143–151.
- Shoeib, M.; Schuster, J.; Rauert, C.; Su, K.; Smyth, S.A.; Harner, T. Emission of poly and perfluoroalkyl substances, UV-filters and siloxanes to air from wastewater treatment plants. *Environ. Pollut.* **2016**, *218*, 595–604.
- Karásková, P.; Codling, G.; Melymuk, L.; Klanova, J. A critical assessment of passive air samplers for per- and polyfluoroalkyl substances. *Atmos. Environ.* **2018**, *185*, 186–195.

56. Wong, F.; Shoeib, M.; Katsoyiannis, A.; Eckhardt, S.; Stohl, A.; Bohlin-Nizzetto, P.; Li, H.; Fellin, P.; Su, Y.S.; Hung, H. Assessing temporal trends and source regions of per- and polyfluoroalkyl substances (PFASs) in air under the Arctic Monitoring and Assessment Programme (AMAP). *Atmos. Environ.* **2018**, *172*, 65–73.
